# Supplementary material
Source: PubMed Central journal article supplement (PMC4729364)
Supplement: NIHMS714493-supplement-supplement_1.pdf [file NIHMS714493-supplement-supplement_1.pdf]

## APPENDIX

07

**SUPPLEMENTAL FIGURE**  
**IL-10 concentrations in the**  
**decidual protein extracts of mice**

**Decidual protein extracts**

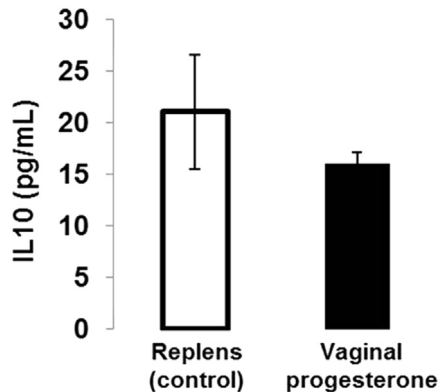

IL-10 concentrations in the decidual protein extracts of mice treated with vaginal progesterone or Replens (control; Lil' Drug Store Products, Inc) (n = 10 each). Data are represented as mean  $\pm$  SEM.

IL, interleukin.

*Furcron. Vaginal progesterone, but not 17OHP-C, has antiinflammatory effects. Am J Obstet Gynecol 2015.*

## SUPPLEMENTAL TABLE

**Antibodies used for immunophenotyping**

| <b>Cell Marker</b> | <b>Fluorochrome</b>  | <b>Clone</b> | <b>Manufacturer</b> |
|--------------------|----------------------|--------------|---------------------|
| ARG1               | FITC                 | Polyclonal   | R&D Systems         |
| CD11b              | PECF594              | M1/70        | BD Biosciences      |
| CD11c              | AF488                | N418         | eBioscience         |
| CD25               | PE-Cy7               | PC61         | BD Biosciences      |
| CD3e               | APC-Cy7 or PE-Cy5    | 145-2C11     | BD Biosciences      |
| CD4                | APC                  | RM4-5        | BD Biosciences      |
| CD45               | V450                 | 30-F11       | BD Biosciences      |
| CD49b              | APC                  | DX5          | BD Biosciences      |
| CD8                | PE                   | 53-6.7       | BD Biosciences      |
| F4/80              | APC-eFluor 780 or PE | BM8          | eBioscience         |
| Foxp3              | AF488                | MF23         | BD Biosciences      |
| IFN $\gamma$       | V450                 | XMG1.2       | BD Biosciences      |
| IL4                | PE-Cy7               | 11B11        | BD Biosciences      |
| iNOS               | PE                   | CXNFT        | eBioscience         |
| Ly6G               | APC-Cy7 or APC       | 1A8          | BD Biosciences      |

UNCORRECTED PROOF
